# Supplementary material for: Prevalence of Vancomycin-Resistant Enterococcus (VRE) in Companion Animals: The First Meta-Analysis and Systematic Review
Source: MDPI journal article supplement (doi:10.3390/antibiotics10020138), 2021-01-31
Supplement: s1 [file s1]

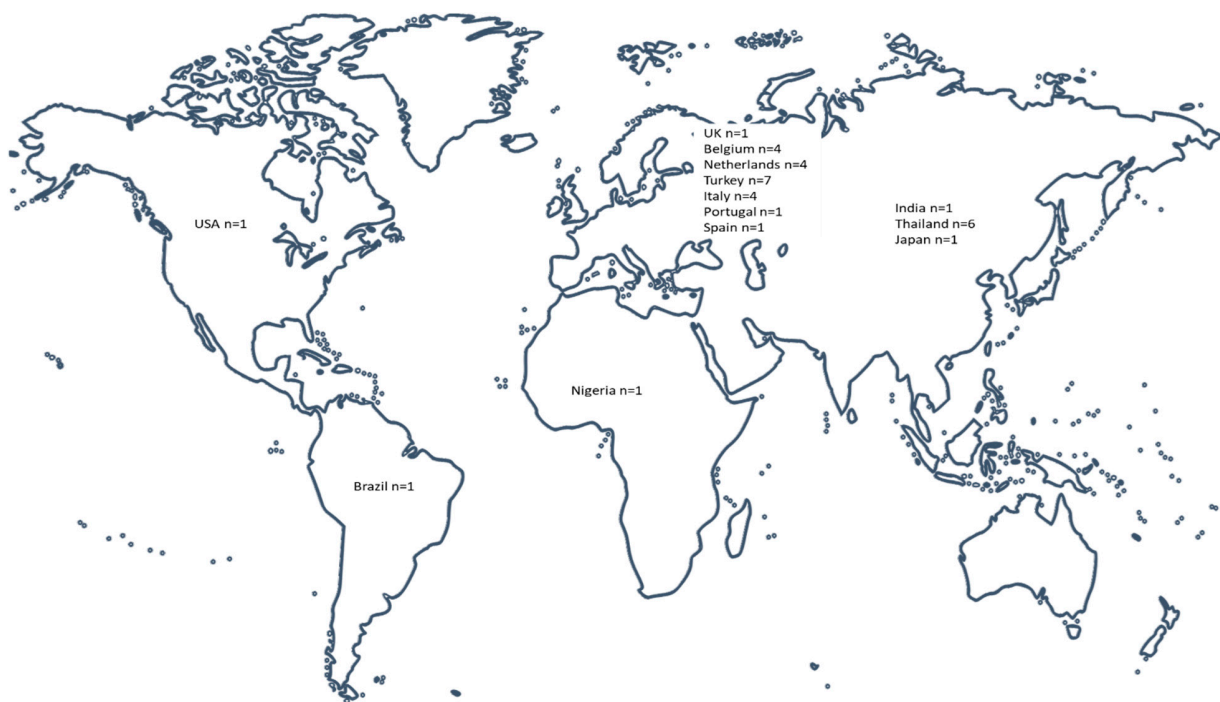

**Figure S1.** Spatial distribution and number of studies of VRE in Companion animals based on data extracted from eligible studies.

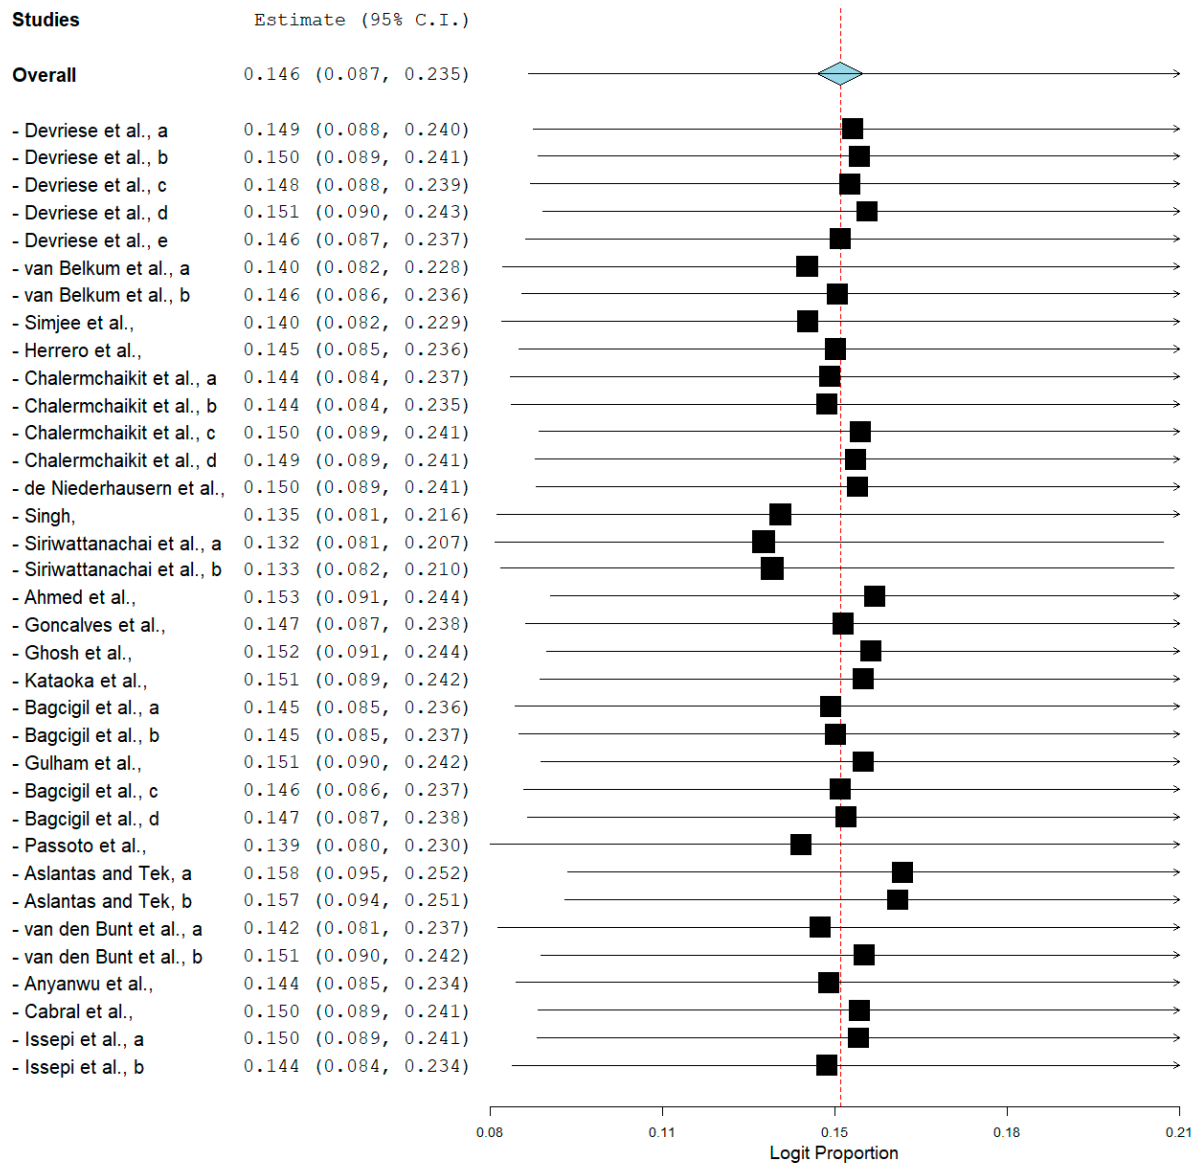

**Figure S2.** Leave-one-out forest plot of VRE in companion animals.

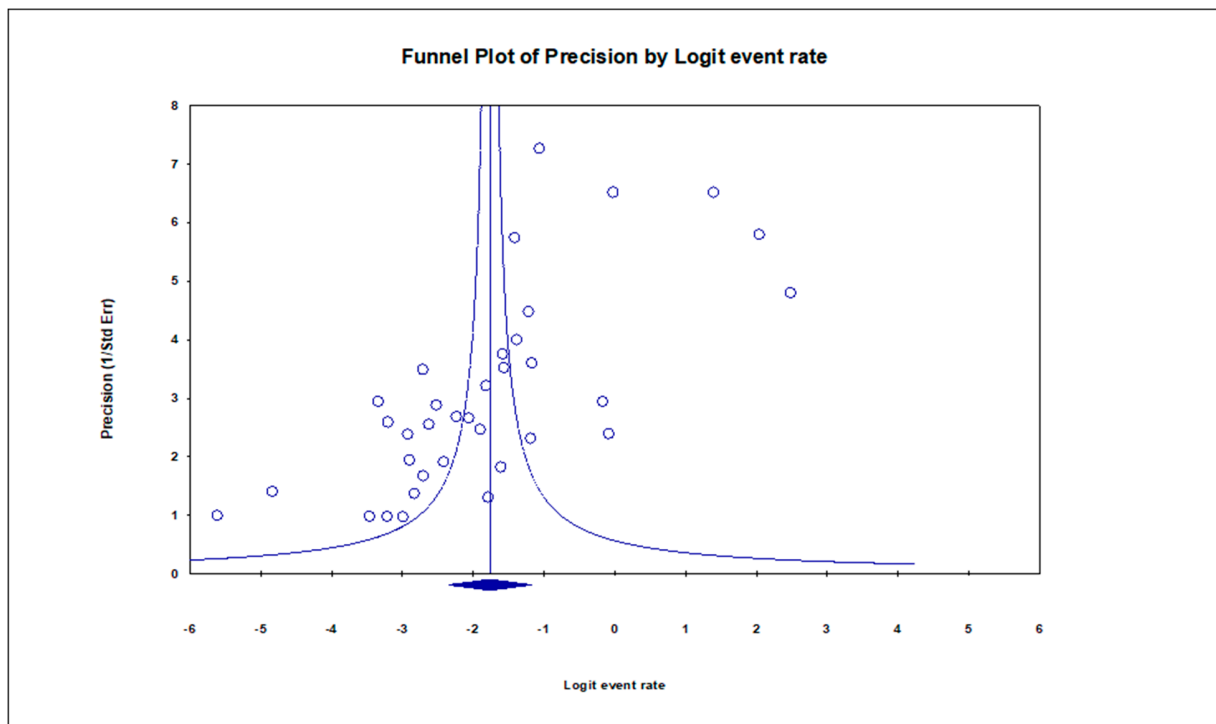

**Figure S3.** Funnel plot of precision showing publication bias in studies reporting the prevalence of VRE in companion animals.
