# Supplementary material for: Prevalence of Vancomycin-Resistant Enterococcus (VRE) in Companion Animals: The First Meta-Analysis and Systematic Review
Source: MDPI journal article supplement (doi:10.3390/antibiotics10020138), 2021-01-31
Supplement: s1 [file s1]

**Quality of included studies by JBI critical appraisal checklist for studies reporting prevalence data**

| Study name |                               | a   |    |     |     |     |     |     |     |         | Overall |
|------------|-------------------------------|-----|----|-----|-----|-----|-----|-----|-----|---------|---------|
|            |                               | 1   | 2  | 3   | 4   | 5   | 6   | 7   | 8   | 9       |         |
| 1          | Devriese et al., 1996         | Yes | No | Yes | Yes | Yes | Yes | Yes | Yes | Unclear | 7       |
| 2          | van Belkum et al., 1996       | Yes | No | Yes     | 8       |
| 3          | Simjee et al., 2002           | Yes | No | Yes     | 8       |
| 4          | Herrero et al., 2004          | Yes | No | Yes     | 8       |
| 5          | Chalermchaikit et al., 2005   | Yes | No | Yes     | 8       |
| 6          | Chalermchaikit et al., 2005   | Yes | No | Yes     | 8       |
| 7          | de Niederhausern et al., 2007 | Yes | No | Yes     | 8       |
| 8          | Singh, 2009                   | Yes | No | Yes     | 8       |
| 9          | Siriwattanachai et al., 2009  | Yes | No | Yes     | 8       |
| 10         | Ahmed et al., 2011            | Yes | No | Yes     | 8       |
| 11         | Goncalves et al., 2010        | Yes | No | Yes     | 8       |
| 12         | Ghosh et al., 2012            | Yes | No | Yes     | 8       |
| 13         | Kataoka et al., 2014          | Yes | No | Yes     | 8       |
| 14         | Bagcigil et al., 2015         | Yes | No | Yes     | 8       |
| 15         | Gulhan et al., 2015           | Yes | No | Yes     | 8       |
| 16         | Bagcigil et al., 2016         | Yes | No | Yes     | 8       |
| 17         | Pasotto et al., 2016          | Yes | No | Yes     | 8       |
| 18         | Aslantas and Tek, 2019        | Yes | No | Yes     | 8       |
| 19         | van den Bunt et al., 2018     | Yes | No | Yes     | 8       |
| 20         | Anyanwu et al., 2019          | Yes | No | Yes     | 8       |
| 21         | Cabral et al., 2020           | Yes | No | Yes     | 8       |
| 22         | Issepi et al., 2020           | Yes | No | Yes     | 8       |

\* **1.** Appropriate sampling frame to address the target population, **2.** Appropriate sampling way of study participants, **3.** Adequate sample size, **4.** Detail description of study participants and settings, **5.** Data analysis with sufficient coverage of the identified sample, **6.** Use of valid methods to identify the condition, **7.** Standard, reliable way of measurement of condition for all participants, **8.** Availability of appropriate statistical analysis, **9.** Adequate response rate and management of low response rate
