# Supplementary material for: Prevalence of Vancomycin-Resistant Enterococcus (VRE) in Companion Animals: The First Meta-Analysis and Systematic Review
Source: Antibiotics (Basel). 2021 Jan 31;10(2):138. doi: 10.3390/antibiotics10020138 (PMC7911405; doi:10.3390/antibiotics10020138)
Supplement: Supplementary file 1 [file antibiotics-10-00138-s001.zip]

Archive with 4 entries (4 files):
- antibiotics-1071922 sup figure.pdf
- Supplementary File S2 VRE in CA.pdf
- Supplementary File S3 VRE in CA.pdf
- Supplemetary File S1 VRE in CA.pdf
